# Supplementary material for: Angiogenic cytokines can reflect the synovitis severity and treatment response to biologics in rheumatoid arthritis
Source: PubMed Central journal article supplement (PMC7272442; doi:10.1038/s12276-020-0443-8), 2020-05-27
Supplement: 12276_2020_443_MOESM1_ESM.pdf [file 12276_2020_443_MOESM1_ESM.pdf]

# Angiogenic cytokines can reflect synovitis severity and treatment response to biologics in rheumatoid arthritis

Ji-Won Kim<sup>1</sup>, Jin-Sun Kong<sup>2,3</sup>, Saseong Lee<sup>2,3</sup>, Seung-Ah Yoo<sup>2,3</sup>, Jung Hee Koh<sup>4</sup>,  
Jingchun Jin<sup>5,6</sup>, and Wan-Uk Kim<sup>2,3,4</sup>\*

<sup>1</sup>Division of Rheumatology, Department of Internal Medicine, Catholic University of Daegu School of Medicine, Daegu, Korea

<sup>2</sup>Department of Biomedicine & Health Sciences, The Catholic University of Korea, Seoul, Korea

<sup>3</sup>Center for Integrative Rheumatoid Transcriptomics and Dynamics, The Catholic University of Korea, Seoul, Korea

<sup>4</sup>Division of Rheumatology, Department of Internal Medicine, The Catholic University of Korea, Seoul, Korea

<sup>5</sup>Department of Immunology of Yanbian University Hospital, Yanji 133000, Jilin Province, China

<sup>6</sup>Key Laboratory of Science and Technology Department (Jilin Province), Cancer Research Center, Yanji 133002, Jilin Province, China

This work was supported by a grant from the National Research Foundation of Korea (NRF) funded by the Ministry of Education, Science and Technology (No. 2015R1A3A2032927 to W.U.K and 2018R1D1A1B07045491 to J.H.K).

Correspondence and reprint requests to:

Dr. Wan-Uk Kim, Division of Rheumatology, Department of Internal Medicine, Catholic University of Korea, School of Medicine, Seoul, Korea (E-mail: wan725@catholic.ac.kr) or Dr. Jingchun Jin, Department of Immunology of Yanbian University Hospital, Yanji 133000, Jilin Province, China (E-mail: jingchun680928@163.com)

**Keywords:** vascular endothelial growth factor, placenta growth factor, ultrasonography, synovitis severity, treatment response

**Running title:** Clinical role of angiogenic cytokines in RA

### Supplementary figure legends

**Supplementary Fig. 1.** Flow chart describing treatment regimen of RA patients enrolled for serum sampling. DA, disease activity; c-DMARD: conventional disease-modifying anti-rheumatic drug; b-DMARD: biologic disease-modifying anti-rheumatic drug; ts-DMARD: targeted synthetic disease-modifying anti-rheumatic drug; and TNFi: tumor necrosis factor inhibitor.

**Supplementary Fig. 2.** A representative of ultrasonographic findings demonstrating synovial hypertrophy and hyper-vascularity. **(a and b)** Grey scale US images showing synovial hypertrophy in proximal interphalangeal (PIP) joints. **(c and d)** Power-Doppler US images showing vascularity of the synovium in PIP joints.

**Supplementary Fig. 3.** Correlations of  $\Delta$ DAS28 with  $\Delta$ ESR,  $\Delta$ CRP,  $\Delta$ VEGF, and  $\Delta$ IL-6 levels in patients treated with c-DMARD (a), b-DMARD (b), Tocilizumab (TCZ) (c), or non-TCZ biologics (d).

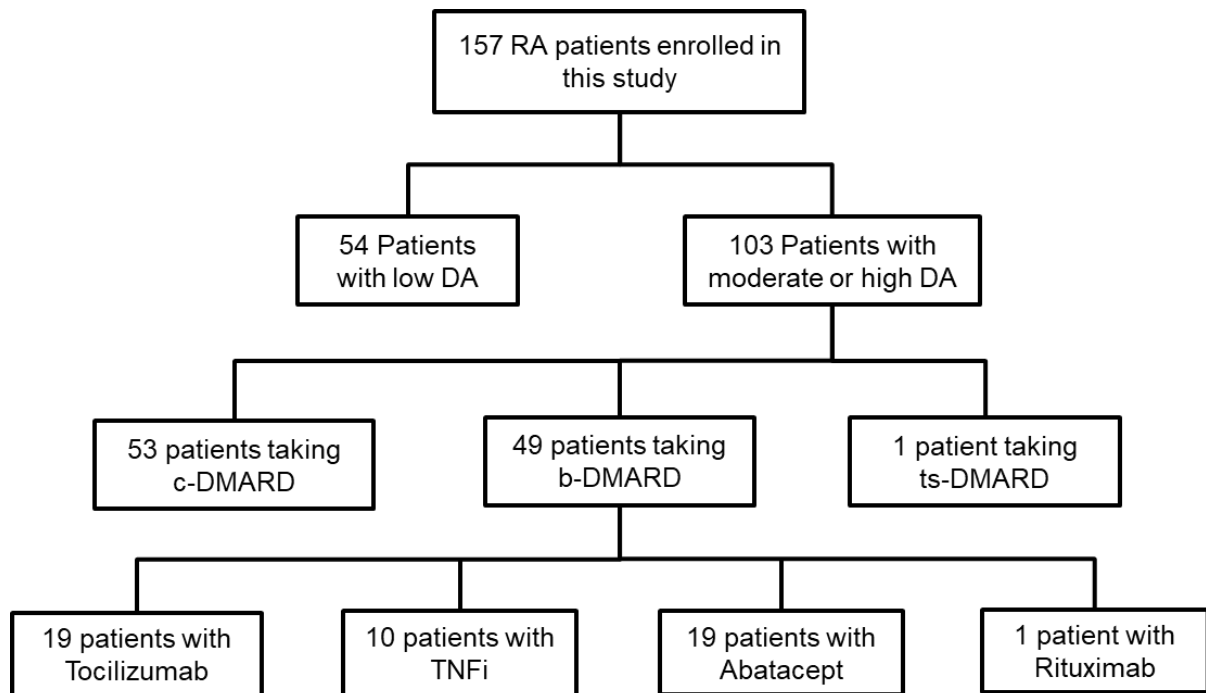

**Supplementary Fig. 1.** Flow chart describing treatment regimen of RA patients enrolled for serum sampling. DA, disease activity; c-DMARD: conventional disease-modifying anti-rheumatic drug; b-DMARD: biologic disease-modifying anti-rheumatic drug; ts-DMARD: targeted synthetic disease-modifying anti-rheumatic drug; and TNFi: tumor necrosis factor inhibitor.

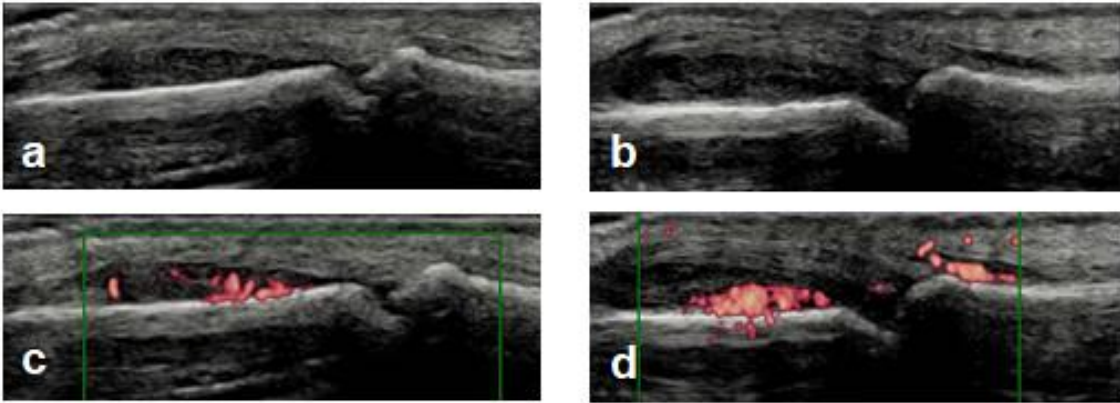

**Supplementary Fig. 2.** A representative of ultrasonographic findings demonstrating synovial hypertrophy and hyper-vascularity. (a and b) Grey scale US images showing synovial hypertrophy in proximal interphalangeal (PIP) joints. (c and d) Power-Doppler US images showing vascularity of the synovium in PIP joints.

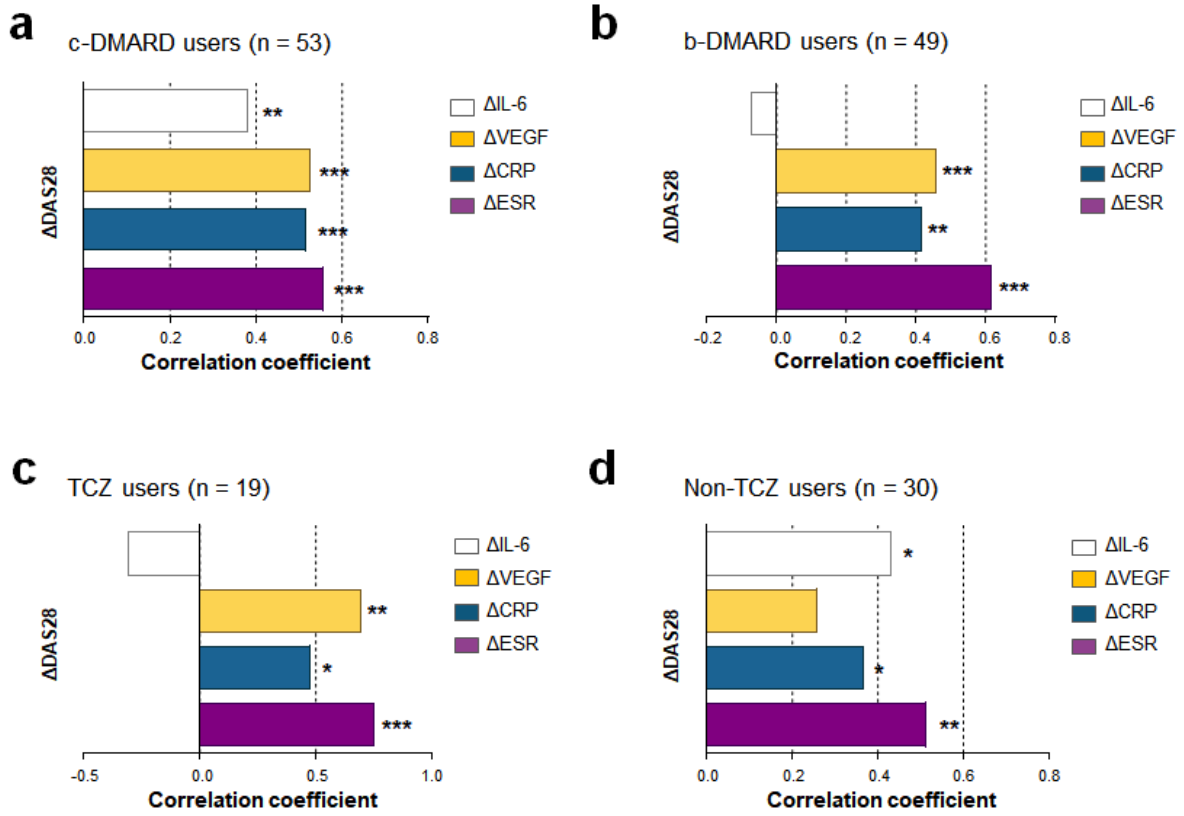

**Supplementary Fig. 3.** Correlations of  $\Delta$ DAS28 with  $\Delta$ ESR,  $\Delta$ CRP,  $\Delta$ VEGF, and  $\Delta$ IL-6 levels in patients treated with c-DMARD (a), b-DMARD (b), Tocilizumab (TCZ) (c), or non-TCZ biologics (d).

**Supplementary Table 1.** Characteristics of RA patients whose synovial fluids were obtained

| Variable                                                 | Total patients (n=54) |
|----------------------------------------------------------|-----------------------|
| Age, years                                               | 59.3 (12.4)           |
| Female, n (%)                                            | 51 (94.4)             |
| Serum RF, IU/mL                                          | 59.6 (7.5-173.7)      |
| Serum ACPA, U/mL                                         | 84.0 (5.4-291.3)      |
| Blood WBC count, / $\mu$ L                               | 7,390 (6,373-8,958)   |
| Blood % neutrophil                                       | 65.1 (10.6)           |
| Hemoglobin, g/dL                                         | 12.3 (1.4)            |
| ESR, mm/hour                                             | 22.5 (12.8-39.3)      |
| CRP, mg/dL                                               | 0.89 (0.20-2.08)      |
| WBC count in the SF, / $\mu$ L                           | 11,700 (4,275-17,200) |
| % neutrophil in the SF                                   | 63.0 (43.0-75.5)      |
| Glucocorticoid use, n (%)                                | 46 (85.2)             |
| Glucocorticoid dose, PD equivalent, mg/day               | 5.0 (2.5-7.5)         |
| Methotrexate use, n (%)                                  | 28 (51.9)             |
| GSUS grade $\geq$ 2, n (%)                               | 31 (57.4)             |
| PDUS grade $\geq$ 1, n (%)                               | 22 (40.7)             |
| Active synovitis (GSUS $\geq$ 2 or PDUS $\geq$ 1), n (%) | 32 (59.3)             |

Data are expressed as mean (standard deviation) or median (interquartile range) for continuous variables. RF: rheumatoid factor; ACPA: anti-citrullinated peptide antibodies; WBC: white blood cell; ESR: erythrocyte sedimentation rate; CRP: C-reactive protein; SF: synovial fluid; PD: prednisone; GSUS: grey scale ultrasound; and PDUS: power-Doppler ultrasound.

**Supplementary Table 2.** Baseline characteristics of RA patients whose sera were obtained

| Variable                    | Total (n=157)    | Low DA (n=54)*    | Moderate or High DA (n=103)* | p value*         |
|-----------------------------|------------------|-------------------|------------------------------|------------------|
| Age, years                  | 56 (11.6)        | 55.9 (11.8)       | 56 (11.6)                    | 0.951            |
| Female, n (%)               | 136 (86.6)       | 45 (83.3)         | 91 (88.3)                    | 0.380            |
| BMI, kg/m <sup>2</sup>      | 23 (20.8-24.4)   | 22.8 (20.5-23.9)  | 23.1 (21-24.9)               | 0.125            |
| Duration of disease, years  | 5 (1-13.5)       | 7 (3-12.3)        | 4 (0-15)                     | <b>0.026</b>     |
| ESR, mm/hour                | 26 (13-44)       | 12 (3.8-21)       | 36 (20-52)                   | <b>&lt;0.001</b> |
| CRP, mg/dL                  | 0.42 (0.08-1.42) | 0.06 (0.02-0.21)  | 0.90 (0.34-2.0)              | <b>&lt;0.001</b> |
| RF, IU/mL                   | 99 (33.7-362.7)  | 69.7 (19.9-156.2) | 121 (40.4-476.7)             | <b>0.015</b>     |
| ACPA, U/mL                  | 171.3 (37-340)   | 200 (42.3-340)    | 163.5 (34.9-340)             | 0.949            |
| Glucocorticoid use, n (%)   | 110 (70.1)       | 39 (72.2)         | 71 (68.9)                    | 0.669            |
| PD equivalent, mg/day       | 2.5 (0-5)        | 2.5 (0-5)         | 2.5 (0-5)                    | 0.772            |
| Previous c-DMARD use, n (%) | 135 (86.0)       | 51 (94.4)         | 84 (81.6)                    | <b>0.027</b>     |
| MTX dose, mg/week           | 7.5 (0-10)       | 7.5 (0-10)        | 7.5 (0-10)                   | 0.532            |
| Previous b-DMARD use, n (%) | 28 (17.8)        | 19 (35.2)         | 9 (8.7)                      | <b>&lt;0.001</b> |

Data are expressed as mean (standard deviation) or median (interquartile range) for continuous variables. \*Comparison of characteristics between patients with low DA and those with moderate or high DA by student's unpaired *t* test. DA: disease activity; BMI: body mass index; ESR: erythrocyte sedimentation rate; CRP: C-reactive protein; RF: rheumatoid factor; ACPA: anti-citrullinated peptide antibodies; PD: prednisone; c-DMARD: conventional disease-modifying anti-rheumatic drug; MTX: methotrexate; and b-DMARD: biologic disease-modifying anti-rheumatic drug.

**Supplementary Table 3.** Baseline characteristics of RA patients treated with c-DMARD versus b-DMARD

| Variable                   | c-DMARD users<br>(n=53) | b-DMARD users<br>(n=49) | p value      |
|----------------------------|-------------------------|-------------------------|--------------|
| Age, years                 | 55.9 (11.9)             | 56.0 (11.5)             | 0.960        |
| Female, n (%)              | 46 (86.8)               | 44 (89.8)               | 0.638        |
| BMI, kg/m <sup>2</sup>     | 23.1 (21.3-25.1)        | 23.1 (20.8-24.5)        | 0.467        |
| Duration of disease, years | 2 (0-14.5)              | 5 (1-16)                | 0.082        |
| ESR, mm/hour               | 32 (19-46)              | 43 (25-60)              | <b>0.024</b> |
| CRP, mg/dL                 | 0.78 (0.33-1.84)        | 1.03 (0.37-2.53)        | 0.269        |
| Baseline DAS28             | 4.6 (0.9)               | 5.0 (1.1)               | <b>0.030</b> |
| RF, IU/mL                  | 129.9 (28.3-484.6)      | 138.1 (47.8-528.6)      | 0.350        |
| ACPA, U/mL                 | 165 (32.3-340)          | 152 (35.2-340)          | 0.525        |
| vdH Sharp score            | 8 (0-33)                | 17 (5-38.5)             | 0.090        |
| Glucocorticoid use, n (%)  | 31 (58.5)               | 40 (81.6)               | <b>0.011</b> |
| PD equivalent, mg/day      | 2.5 (0-5)               | 5 (2.5-5)               | <b>0.019</b> |
| MTX dose, mg/week          | 7.5 (0-10)              | 10 (7.5-12.5)           | <b>0.045</b> |

Data are expressed as mean (standard deviation) or median (interquartile range) for continuous variables. c-DMARD: conventional disease-modifying anti-rheumatic drug; b-DMARD: biologic disease-modifying anti-rheumatic drug; BMI: body mass index; ESR: erythrocyte sedimentation rate; CRP: C-reactive protein; DAS28: disease activity score 28; RF: rheumatoid factor; ACPA: anti-citrullinated peptide antibodies; vdH: van der Heijde; PD: prednisone; and MTX: methotrexate.



**Supplementary Table 4.** Baseline characteristics of RA patients according to their treatment response to DMARD

| Variable                   | Good or moderate response (n=82) | No response (n=21)     | p value      |
|----------------------------|----------------------------------|------------------------|--------------|
| Age, years                 | 57.3 (11.0)                      | 50.9 (12.8)            | <b>0.022</b> |
| Female, n (%)              | 70 (85.4)                        | 21 (100)               | 0.120        |
| BMI, kg/m <sup>2</sup>     | 23.2 (21.1-25.1)                 | 22.3 (20.8-24.9)       | 0.466        |
| Duration of disease, years | 4 (0-15)                         | 2 (0-13)               | 0.340        |
| ESR, mm/hour               | 36 (19-52.3)                     | 38 (23.5-50.5)         | 0.863        |
| CRP, mg/dL                 | 0.84 (0.34-2.09)                 | 1.09 (0.36-1.86)       | 0.797        |
| Baseline DAS28             | 4.9 (1.0)                        | 4.5 (1.0)              | 0.087        |
| RF, IU/mL                  | 119.2 (37.9-499.8)               | 129.9 (49.5-405.1)     | 0.925        |
| ACPA, U/mL                 | 147 (28-340)                     | 198.5 (141.9-340)      | 0.130        |
| vdH Sharp score            | 10 (4-35)                        | 12 (3-42)              | 0.937        |
| Treatment                  |                                  |                        |              |
| Glucocorticoid use, n (%)  | 60 (73.2)                        | 11 (52.4)              | 0.066        |
| PD equivalent, mg/day      | 2.5 (0-5)                        | 2.5 (0-5)              | 0.333        |
| c-DMARD users, n (%)       | 40 (48.8)                        | 13 (61.9)              | 0.283        |
| b-DMARD users, n (%)       | 41 (50.0)                        | 8 (38.1)               | 0.330        |
| Baseline VEGF              | 0.028 (0.006-0.064)              | 0.028 (0.001-0.042)    | 0.519        |
| Baseline IL-6              | 0.007 (0.003-0.018)              | 0.004 (0.002-0.016)    | 0.202        |
| ΔVEGF (Baseline-F/U)       | 0.010 (0, 0.031)                 | -0.001 (-0.015, 0.016) | <b>0.011</b> |
| ΔIL-6 (Baseline-F/U)       | 0.003 (-0.003, 0.011)            | 0 (-0.005, 0.009)      | 0.494        |
| ΔESR (Baseline-F/U)        | 17 (9, 36.5)                     | 6 (-3.5, 22)           | <b>0.005</b> |
| ΔCRP (Baseline-F/U)        | 0.62 (0.10, 1.77)                | 0.61 (0.02, 1.17)      | 0.307        |

Data are expressed as mean (standard deviation) or median (interquartile range) for continuous variables. BMI: body mass index; ESR: erythrocyte sedimentation rate; CRP: C-reactive protein; DAS28: disease activity score 28; RF: rheumatoid factor; ACPA: anti-citrullinated peptide antibodies; vdH: van der Heijde; PD: prednisone; c-DMARD: conventional disease-modifying anti-rheumatic drug; b-DMARD: biologic disease-modifying anti-rheumatic drug; VEGF: vascular endothelial growth factor; IL-6: interleukin-6; and F/U: follow-up.
